# Supplementary material
Source: PubMed Central journal article supplement (PMC4167670)
Supplement: NIHMS570758-supplement-supplement_1.pdf [file NIHMS570758-supplement-supplement_1.pdf]

Supplemental Table e-1: Baseline characteristics and trial status, US/Canada only:

|                                                            | On Assigned AP<br>(n = 1092) | Off assigned AP<br>per patient<br>request<br>(n = 69) | Withdrew<br>consent or lost<br>to-follow-up<br>(n = 154) | p-value |
|------------------------------------------------------------|------------------------------|-------------------------------------------------------|----------------------------------------------------------|---------|
| Age , mean (sd)                                            | 61 (10)                      | 62 (12)                                               | 62 (12)                                                  | 0.6     |
| Male gender, %                                             | 60                           | 67                                                    | 45                                                       | 0.2     |
| Ethnicity, %                                               |                              |                                                       |                                                          | 0.5     |
| White, not Hispanic                                        | 62                           | 52                                                    | 56                                                       |         |
| Hispanic                                                   | 10                           | 14                                                    | 10                                                       |         |
| Black                                                      | 24                           | 28                                                    | 30                                                       |         |
| Other or multiracial                                       | 4                            | 6                                                     | 3                                                        |         |
| Education, %                                               |                              |                                                       |                                                          | 0.4     |
| 0-4 yrs                                                    | 3                            | 3                                                     | 6                                                        |         |
| 5-8 yrs                                                    | 7                            | 7                                                     | 10                                                       |         |
| 9-12 yrs                                                   | 39                           | 38                                                    | 40                                                       |         |
| any college                                                | 50                           | 52                                                    | 44                                                       |         |
| Marital status, %                                          |                              |                                                       |                                                          | 0.09    |
| never married                                              | 10                           | 10                                                    | 12                                                       |         |
| married/common law                                         | 60                           | 46                                                    | 55                                                       |         |
| separated/divorced                                         | 21                           | 26                                                    | 19                                                       |         |
| widowed                                                    | 9                            | 17                                                    | 14                                                       |         |
| Living arrangement, %                                      |                              |                                                       |                                                          | 0.5     |
| alone in own home or apt                                   | 23                           | 26                                                    | 27                                                       |         |
| with others in home or apt                                 | 77                           | 74                                                    | 73                                                       |         |
| Mild cognitive impairment, %                               | 43                           | 54                                                    | 52                                                       | 0.03    |
| Barthel Index $\geq$ 95, %                                 | 86                           | 87                                                    | 84                                                       | 0.9     |
| Modified Rankin Score, %                                   |                              |                                                       |                                                          | 0.5     |
| 0                                                          | 15                           | 20                                                    | 16                                                       |         |
| 1                                                          | 55                           | 49                                                    | 52                                                       |         |
| 2                                                          | 25                           | 22                                                    | 29                                                       |         |
| 3                                                          | 6                            | 9                                                     | 3                                                        |         |
| Stroke-specific QOL score at 3 mo, mean<br>(sd) (n = 1213) | 48 (10)                      | 47 (11)                                               | 45 (10)                                                  | 0.006   |
| Prior symptomatic small subcortical stroke<br>or TIA, %    | 15                           | 9                                                     | 19                                                       | 0.1     |
| Frailty index, %                                           |                              |                                                       |                                                          | 0.03    |
| 1-2                                                        | 25                           | 22                                                    | 18                                                       |         |
| 3                                                          | 32                           | 43                                                    | 28                                                       |         |
| 4                                                          | 26                           | 25                                                    | 29                                                       |         |
| 5+                                                         | 17                           | 10                                                    | 25                                                       |         |
| # prescription medications, mean (sd)                      | 4.4 (2.3)                    | 4.1 (2.5)                                             | 5.1 (2.7)                                                | 0.005   |

Supplemental Table e-2: Living arrangement and trial status, stratified by region

| Living arrangement, %      | On Assigned AP | Off assigned AP<br>per patient<br>request | Withdrew<br>consent or lost<br>to-follow-up |
|----------------------------|----------------|-------------------------------------------|---------------------------------------------|
| US/Canada, n               | 1092           | 69                                        | 154                                         |
| alone in own home or apt   | 23             | 26                                        | 27                                          |
| with others in home or apt | 77             | 74                                        | 73                                          |
| Mexico/Latin America, n    | 646            | 9                                         | 24                                          |
| alone in own home or apt   | 8              | 0                                         | 13                                          |
| with others in home or apt | 92             | 100                                       | 88                                          |
| Spain, n                   | 322            | 16                                        | 24                                          |
| alone in own home or apt   | 17             | 19                                        | 17                                          |
| with others in home or apt | 83             | 81                                        | 83                                          |
